# Supplementary material for: Late Diagnosis of HIV Infection in Metropolitan Areas of the United States and Puerto Rico
Source: Springer Nature journal article supplement (doi:10.1007/s10461-015-1241-5), 2015-11-05
Supplement: MOESM1 [file 8821172]

**Supplemental Table 1** Stage 3 (AIDS) at the time of diagnosis of HIV infection, among persons aged 13 years and older, by race/ethnicity and metropolitan statistical area, 2012--United States and Puerto Rico

|  | Totala | | |  | Black/African American | | |  | Hispanic/Latinob | | |  | White | | |
| --- | --- | --- | --- | --- | --- | --- | --- | --- | --- | --- | --- | --- | --- | --- | --- |
|  |  | Stage 3 (AIDS) at diagnosisc | |  |  | Stage 3 (AIDS) at diagnosisc | |  |  | Stage 3 (AIDS) at diagnosisc | |  |  | Stage 3 (AIDS) at diagnosisc | |
| Area of Residence | No. | No. | % |  | No. | No. | % |  | No. | No. | % |  | No. | No. | % |
| Akron, OH | 41 | 7 | 17.1 |  | 18 | 4 | 22.2 |  | 1 | 0 | 0.0 |  | 21 | 3 | 14.3 |
| Albany-Schenectady-Troy, NY | 68 | 18 | 26.5 |  | 25 | 4 | 16.0 |  | 13 | 4 | 30.8 |  | 24 | 9 | 37.5 |
| Albuquerque, NM | 51 | 17 | 33.3 |  | 2 | 0 | 0.0 |  | 30 | 13 | 43.3 |  | 14 | 3 | 21.4 |
| Allentown-Bethlehem-Easton, PA-NJ | 55 | 24 | 43.6 |  | 14 | 4 | 28.6 |  | 21 | 10 | 47.6 |  | 18 | 8 | 44.4 |
| Atlanta-Sandy Springs-Roswell, GA | 1,512 | 369 | 24.4 |  | 1,113 | 270 | 24.3 |  | 164 | 47 | 28.7 |  | 187 | 36 | 19.3 |
| Augusta-Richmond County, GA-SC | 115 | 31 | 27.0 |  | 77 | 20 | 26.0 |  | 4 | 0 | 0.0 |  | 31 | 10 | 32.3 |
| Austin-Round Rock, TX | 295 | 54 | 18.3 |  | 52 | 13 | 25.0 |  | 114 | 21 | 18.4 |  | 114 | 18 | 15.8 |
| Bakersfield, CA | 98 | 22 | 22.4 |  | 18 | 2 | 11.1 |  | 46 | 13 | 28.3 |  | 33 | 7 | 21.2 |
| Baltimore-Columbia-Towson, MD | 787 | 155 | 19.7 |  | 589 | 110 | 18.7 |  | 30 | 9 | 30.0 |  | 133 | 28 | 21.1 |
| Baton Rouge, LA | 268 | 70 | 26.1 |  | 232 | 58 | 25.0 |  | 6 | 2 | 33.3 |  | 29 | 10 | 34.5 |
| Birmingham-Hoover, AL | 212 | 29 | 13.7 |  | 141 | 21 | 14.9 |  | 6 | 2 | 33.3 |  | 54 | 5 | 9.3 |
| Boise City, ID | 23 | 6 | 26.1 |  | 1 | 0 | 0.0 |  | 3 | 1 | 33.3 |  | 18 | 5 | 27.8 |
| Boston, Mass-NH | 511 | 130 | 25.4 |  | 161 | 49 | 30.4 |  | 135 | 35 | 25.9 |  | 188 | 41 | 21.8 |
| Bridgeport-Stamford-Norwalk, CT | 79 | 24 | 30.4 |  | 37 | 13 | 35.1 |  | 17 | 3 | 17.6 |  | 21 | 6 | 28.6 |
| Buffalo-Cheektowaga-Niagara Falls, NY | 107 | 26 | 24.3 |  | 47 | 11 | 23.4 |  | 18 | 5 | 27.8 |  | 31 | 7 | 22.6 |
| Cape Coral-Fort Myers, FL | 99 | 25 | 25.3 |  | 44 | 13 | 29.5 |  | 18 | 5 | 27.8 |  | 37 | 7 | 18.9 |
| Charleston-North Charleston, SC | 106 | 25 | 23.6 |  | 72 | 12 | 16.7 |  | 7 | 4 | 57.1 |  | 26 | 9 | 34.6 |
| Charlotte-Concord-Gastonia, NC-SC | 386 | 77 | 19.9 |  | 255 | 45 | 17.6 |  | 27 | 7 | 25.9 |  | 81 | 19 | 23.5 |
| Chattanooga, TN-GA | 60 | 15 | 25.0 |  | 29 | 6 | 20.7 |  | 3 | 2 | 66.7 |  | 28 | 7 | 25.0 |
| Chicago, IL-IN-WI | 1,580 | 381 | 24.1 |  | 804 | 179 | 22.3 |  | 338 | 104 | 30.8 |  | 357 | 79 | 22.1 |
| Cincinnati, OH-KY-IN | 204 | 58 | 28.4 |  | 111 | 28 | 25.2 |  | 9 | 2 | 22.2 |  | 74 | 25 | 33.8 |
| Cleveland-Elyria, OH | 246 | 46 | 18.7 |  | 138 | 25 | 18.1 |  | 25 | 7 | 28.0 |  | 69 | 14 | 20.3 |
| Colorado Springs, CO | 27 | 9 | 33.3 |  | 6 | 2 | 33.3 |  | 10 | 3 | 30.0 |  | 10 | 4 | 40.0 |
| Columbia, SC | 179 | 50 | 27.9 |  | 144 | 41 | 28.5 |  | 5 | 1 | 20.0 |  | 29 | 8 | 27.6 |
| Columbus, OH | 311 | 85 | 27.3 |  | 134 | 30 | 22.4 |  | 9 | 5 | 55.6 |  | 145 | 38 | 26.2 |
| Dallas, TX | 1,255 | 289 | 23.0 |  | 579 | 113 | 19.5 |  | 304 | 82 | 27.0 |  | 302 | 79 | 26.2 |
| Dayton, OH | 78 | 23 | 29.5 |  | 43 | 9 | 20.9 |  | 4 | 0 | 0.0 |  | 30 | 14 | 46.7 |
| Deltona-Daytona Beach-Ormond Beach, FL | 69 | 24 | 34.8 |  | 31 | 14 | 45.2 |  | 7 | 3 | 42.9 |  | 29 | 7 | 24.1 |
| Denver-Aurora-Lakewood, CO | 291 | 61 | 21.0 |  | 55 | 7 | 12.7 |  | 84 | 28 | 33.3 |  | 142 | 25 | 17.6 |
| Des Moines-West Des Moines, IA | 42 | 18 | 42.9 |  | 6 | 4 | 66.7 |  | 2 | 0 | 0.0 |  | 29 | 12 | 41.4 |
| Detroit, MI | 555 | 118 | 21.3 |  | 382 | 81 | 21.2 |  | 16 | 2 | 12.5 |  | 131 | 28 | 21.4 |
| Durham-Chapel Hill, NC | 91 | 12 | 13.2 |  | 61 | 7 | 11.5 |  | 14 | 5 | 35.7 |  | 12 | 0 | 0.0 |
| El Paso, TX | 142 | 32 | 22.5 |  | 12 | 1 | 8.3 |  | 120 | 29 | 24.2 |  | 10 | 2 | 20.0 |
| Fresno, CA | 103 | 37 | 35.9 |  | 10 | 5 | 50.0 |  | 62 | 20 | 32.3 |  | 23 | 9 | 39.1 |
| Grand Rapids-Wyoming, MI | 48 | 13 | 27.1 |  | 19 | 4 | 21.1 |  | 7 | 2 | 28.6 |  | 18 | 7 | 38.9 |
| Greensboro-High Point, NC | 114 | 20 | 17.5 |  | 77 | 13 | 16.9 |  | 6 | 2 | 33.3 |  | 27 | 5 | 18.5 |
| Greenville-Anderson-Mauldin, SC | 85 | 25 | 29.4 |  | 48 | 14 | 29.2 |  | 4 | 2 | 50.0 |  | 32 | 9 | 28.1 |
| Harrisburg-Carlisle, PA | 47 | 16 | 34.0 |  | 18 | 9 | 50.0 |  | 6 | 2 | 33.3 |  | 20 | 4 | 20.0 |
| Hartford-West Hartford-East Hartford, CT | 102 | 35 | 34.3 |  | 35 | 15 | 42.9 |  | 41 | 9 | 22.0 |  | 23 | 11 | 47.8 |
| Houston-The Woodlands-Sugar Land, TX | 1,480 | 350 | 23.6 |  | 687 | 142 | 20.7 |  | 511 | 144 | 28.2 |  | 230 | 57 | 24.8 |
| Indianapolis-Carmel-Anderson, IN | 239 | 54 | 22.6 |  | 132 | 25 | 18.9 |  | 24 | 3 | 12.5 |  | 75 | 23 | 30.7 |
| Jackson, MS | 184 | 38 | 20.7 |  | 153 | 31 | 20.3 |  | 4 | 2 | 50.0 |  | 18 | 4 | 22.2 |
| Jacksonville, FL | 369 | 86 | 23.3 |  | 235 | 52 | 22.1 |  | 27 | 9 | 33.3 |  | 95 | 23 | 24.2 |
| Kansas City, MO-KS | 209 | 68 | 32.5 |  | 98 | 26 | 26.5 |  | 27 | 15 | 55.6 |  | 74 | 25 | 33.8 |
| Knoxville, TN | 57 | 19 | 33.3 |  | 14 | 5 | 35.7 |  | 3 | 2 | 66.7 |  | 40 | 12 | 30.0 |
| Lakeland-Winter Haven, FL | 93 | 30 | 32.3 |  | 36 | 13 | 36.1 |  | 22 | 6 | 27.3 |  | 33 | 10 | 30.3 |
| Lancaster, PA | 29 | 10 | 34.5 |  | 9 | 5 | 55.6 |  | 7 | 3 | 42.9 |  | 10 | 2 | 20.0 |
| Las Vegas-Henderson-Paradise, NV | 330 | 98 | 29.7 |  | 73 | 28 | 38.4 |  | 104 | 27 | 26.0 |  | 119 | 39 | 32.8 |
| Little Rock-North Little Rock-Conway, AR | 124 | 30 | 24.2 |  | 67 | 16 | 23.9 |  | 7 | 3 | 42.9 |  | 48 | 10 | 20.8 |
| Los Angeles-Long Beach-Anaheim, CA | 2,286 | 479 | 21.0 |  | 444 | 79 | 17.8 |  | 1,095 | 254 | 23.2 |  | 563 | 101 | 17.9 |
| Louisville/Jefferson County, KY-IN | 199 | 41 | 20.6 |  | 94 | 16 | 17.0 |  | 9 | 3 | 33.3 |  | 86 | 20 | 23.3 |
| Madison, WI | 25 | 8 | 32.0 |  | 6 | 2 | 33.3 |  | 4 | 2 | 50.0 |  | 15 | 4 | 26.7 |
| McAllen-Edinburg-Mission, TX | 70 | 28 | 40.0 |  | 0 | 0 | . |  | 68 | 28 | 41.2 |  | 1 | 0 | 0.0 |
| Memphis, TN-MS-AR | 449 | 75 | 16.7 |  | 369 | 57 | 15.4 |  | 14 | 5 | 35.7 |  | 59 | 9 | 15.3 |
| Miami, FL | 2,164 | 444 | 20.5 |  | 968 | 232 | 24.0 |  | 735 | 135 | 18.4 |  | 437 | 71 | 16.2 |
| Milwaukee-Waukesha-West Allis, WI | 129 | 37 | 28.7 |  | 73 | 19 | 26.0 |  | 18 | 5 | 27.8 |  | 33 | 12 | 36.4 |
| Minneapolis-St. Paul-Bloomington, MN-WI | 266 | 68 | 25.6 |  | 105 | 32 | 30.5 |  | 38 | 8 | 21.1 |  | 106 | 24 | 22.6 |
| Modesto, CA | 19 | 9 | 47.4 |  | 2 | 0 | 0.0 |  | 7 | 3 | 42.9 |  | 10 | 6 | 60.0 |
| Nashville-Davidson--Murfreesboro--Franklin, TN | 222 | 48 | 21.6 |  | 98 | 13 | 13.3 |  | 18 | 5 | 27.8 |  | 98 | 29 | 29.6 |
| New Haven-Milford, CT | 92 | 38 | 41.3 |  | 44 | 13 | 29.5 |  | 25 | 13 | 52.0 |  | 21 | 12 | 57.1 |
| New Orleans-Metairie, LA | 397 | 117 | 29.5 |  | 289 | 79 | 27.3 |  | 21 | 10 | 47.6 |  | 83 | 26 | 31.3 |
| New York, NY-NJ-PA | 4,352 | 938 | 21.6 |  | 1,837 | 432 | 23.5 |  | 1,403 | 290 | 20.7 |  | 801 | 147 | 18.4 |
| North Port-Sarasota-Bradenton, FL | 69 | 15 | 21.7 |  | 31 | 5 | 16.1 |  | 6 | 2 | 33.3 |  | 31 | 8 | 25.8 |
| Ogden-Clearfield, UT | 15 | 5 | 33.3 |  | 1 | 0 | 0.0 |  | 4 | 2 | 50.0 |  | 10 | 3 | 30.0 |
| Oklahoma City, OK | 134 | 30 | 22.4 |  | 44 | 5 | 11.4 |  | 13 | 3 | 23.1 |  | 64 | 21 | 32.8 |
| Omaha-Council Bluffs, NE-IA | 57 | 13 | 22.8 |  | 19 | 2 | 10.5 |  | 7 | 2 | 28.6 |  | 26 | 6 | 23.1 |
| Orlando-Kissimmee-Sanford, FL | 547 | 133 | 24.3 |  | 261 | 67 | 25.7 |  | 127 | 31 | 24.4 |  | 148 | 32 | 21.6 |
| Oxnard-Thousand Oaks-Ventura, CA | 43 | 13 | 30.2 |  | 1 | 0 | 0.0 |  | 26 | 6 | 23.1 |  | 15 | 7 | 46.7 |
| Palm Bay-Melbourne-Titusville, FL | 61 | 17 | 27.9 |  | 29 | 7 | 24.1 |  | 1 | 0 | 0.0 |  | 31 | 10 | 32.3 |
| Philadelphia, PA-NJ-DE-MD | 1,174 | 304 | 25.9 |  | 725 | 187 | 25.8 |  | 157 | 36 | 22.9 |  | 248 | 69 | 27.8 |
| Phoenix-Mesa-Scottsdale, AZ | 501 | 100 | 20.0 |  | 85 | 12 | 14.1 |  | 178 | 36 | 20.2 |  | 196 | 46 | 23.5 |
| Pittsburgh, PA | 158 | 46 | 29.1 |  | 65 | 16 | 24.6 |  | 3 | 0 | 0.0 |  | 80 | 25 | 31.3 |
| Portland-South Portland, ME | 26 | 7 | 26.9 |  | 8 | 4 | 50.0 |  | 0 | 0 | . |  | 16 | 3 | 18.8 |
| Portland-Vancouver-Hillsboro, OR-WA | 223 | 64 | 28.7 |  | 18 | 4 | 22.2 |  | 36 | 11 | 30.6 |  | 155 | 48 | 31.0 |
| Providence-Warwick, RI-MA | 127 | 39 | 30.7 |  | 24 | 6 | 25.0 |  | 28 | 11 | 39.3 |  | 71 | 21 | 29.6 |
| Provo-Orem, UT | 18 | 4 | 22.2 |  | 0 | 0 | . |  | 4 | 1 | 25.0 |  | 12 | 3 | 25.0 |
| Raleigh, NC | 157 | 37 | 23.6 |  | 100 | 21 | 21.0 |  | 15 | 4 | 26.7 |  | 33 | 10 | 30.3 |
| Richmond, VA | 213 | 53 | 24.9 |  | 154 | 39 | 25.3 |  | 13 | 5 | 38.5 |  | 44 | 8 | 18.2 |
| Riverside-San Bernardino-Ontario, CA | 461 | 109 | 23.6 |  | 72 | 17 | 23.6 |  | 199 | 56 | 28.1 |  | 174 | 31 | 17.8 |
| Rochester, NY | 96 | 29 | 30.2 |  | 40 | 13 | 32.5 |  | 15 | 4 | 26.7 |  | 33 | 10 | 30.3 |
| Sacramento--Roseville--Arden-Arcade, CA | 212 | 38 | 17.9 |  | 53 | 10 | 18.9 |  | 52 | 8 | 15.4 |  | 86 | 12 | 14.0 |
| Salt Lake City, UT | 363 | 84 | 23.1 |  | 229 | 45 | 19.7 |  | 15 | 5 | 33.3 |  | 114 | 33 | 28.9 |
| San Antonio-New Braunfels, TX | 68 | 25 | 36.8 |  | 6 | 1 | 16.7 |  | 14 | 8 | 57.1 |  | 43 | 13 | 30.2 |
| San Diego-Carlsbad, CA | 367 | 80 | 21.8 |  | 48 | 8 | 16.7 |  | 230 | 48 | 20.9 |  | 71 | 20 | 28.2 |
| San Francisco, CA | 469 | 108 | 23.0 |  | 55 | 17 | 30.9 |  | 195 | 46 | 23.6 |  | 185 | 38 | 20.5 |
| San Jose-Sunnyvale-Santa Clara, CA | 861 | 199 | 23.1 |  | 180 | 49 | 27.2 |  | 230 | 57 | 24.8 |  | 342 | 66 | 19.3 |
| San Juan-Carolina-Caguas, PR | 136 | 37 | 27.2 |  | 11 | 3 | 27.3 |  | 54 | 16 | 29.6 |  | 42 | 10 | 23.8 |
| Scranton--Wilkes-Barre--Hazleton, PA | 553 | 124 | 22.4 |  | 0 | 0 | . |  | 549 | 123 | 22.4 |  | 4 | 1 | 25.0 |
| Seattle, WA | 31 | 10 | 32.3 |  | 6 | 4 | 66.7 |  | 6 | 1 | 16.7 |  | 19 | 5 | 26.3 |
| Spokane-Spokane Valley, WA | 376 | 83 | 22.1 |  | 85 | 23 | 27.1 |  | 43 | 11 | 25.6 |  | 210 | 43 | 20.5 |
| Springfield, MA | 26 | 11 | 42.3 |  | 2 | 1 | 50.0 |  | 5 | 0 | 0.0 |  | 14 | 7 | 50.0 |
| St. Louis, MO-IL | 87 | 24 | 27.6 |  | 27 | 9 | 33.3 |  | 37 | 8 | 21.6 |  | 23 | 7 | 30.4 |
| Stockton-Lodi, CA | 48 | 17 | 35.4 |  | 15 | 3 | 20.0 |  | 12 | 3 | 25.0 |  | 18 | 10 | 55.6 |
| Syracuse, NY | 52 | 13 | 25.0 |  | 17 | 3 | 17.6 |  | 6 | 1 | 16.7 |  | 26 | 9 | 34.6 |
| Tampa-St. Petersburg-Clearwater, FL | 503 | 121 | 24.1 |  | 198 | 45 | 22.7 |  | 83 | 23 | 27.7 |  | 209 | 53 | 25.4 |
| Toledo, OH | 51 | 9 | 17.6 |  | 18 | 2 | 11.1 |  | 2 | 0 | 0.0 |  | 28 | 6 | 21.4 |
| Tucson, AZ | 75 | 24 | 32.0 |  | 12 | 3 | 25.0 |  | 26 | 10 | 38.5 |  | 31 | 8 | 25.8 |
| Tulsa, OK | 106 | 25 | 23.6 |  | 14 | 6 | 42.9 |  | 13 | 3 | 23.1 |  | 61 | 13 | 21.3 |
| Urban Honolulu, HI | 63 | 21 | 33.3 |  | 0 | 0 | . |  | 7 | 0 | 0.0 |  | 21 | 5 | 23.8 |
| Virginia Beach-Norfolk-Newport News, VA-NC | 301 | 54 | 17.9 |  | 212 | 33 | 15.6 |  | 19 | 3 | 15.8 |  | 61 | 17 | 27.9 |
| Washington, DC-VA-MD-WV | 1,632 | 360 | 22.1 |  | 1,123 | 260 | 23.2 |  | 172 | 44 | 25.6 |  | 267 | 39 | 14.6 |
| Wichita, KS | 36 | 10 | 27.8 |  | 15 | 5 | 33.3 |  | 4 | 1 | 25.0 |  | 14 | 2 | 14.3 |
| Winston-Salem, NC | 67 | 17 | 25.4 |  | 49 | 13 | 26.5 |  | 1 | 1 | 100.0 |  | 16 | 3 | 18.8 |
| Worcester, MA-CT | 62 | 19 | 30.6 |  | 16 | 6 | 37.5 |  | 20 | 6 | 30.0 |  | 22 | 6 | 27.3 |
| Youngstown-Warren-Boardman, OH-PA | 30 | 12 | 40.0 |  | 13 | 8 | 61.5 |  | 4 | 1 | 25.0 |  | 12 | 3 | 25.0 |
|  |  |  |  |  |  |  |  |  |  |  |  |  |  |  |  |
| Subtotal for MSAs (population≥500,000) | 34,881 | 8,132 | 23.3 |  | 15,554 | 3,535 | 22.7 |  | 8,558 | 2,103 | 24.6 |  | 8,981 | 2,074 | 23.1 |
| Metropolitan areas (population 50,000 to 499,999) | 4,775 | 1,255 | 26.3 |  | 2,114 | 500 | 23.7 |  | 788 | 249 | 31.6 |  | 1,603 | 421 | 26.3 |
| Nonmetropolitan areas | 2,419 | 717 | 29.6 |  | 1,068 | 316 | 29.6 |  | 295 | 84 | 28.5 |  | 926 | 274 | 29.6 |
| Total | 42,368 | 10,161 | 24.0 |  | 18,915 | 4,382 | 23.2 |  | 9,686 | 2,448 | 25.3 |  | 11,566 | 2,779 | 24.0 |
| aIncludes American Indian/Alaska Native, Asian, Native Hawaiian/other Pacific Islanders, and multiple races. | | | | | | | | | | | |
| bHispanics/Latinos can be of any race. | | | | | | | | | | | |
| cBased on first CD4 test performed or documentation of an AIDS-defining condition ≤3 months after diagnosis of HIV infection. | | | | | | | | | | | |
